# Supplementary material for: Diversification and genetic differentiation of cultivated melon inferred from sequence polymorphism in the chloroplast genome
Source: PubMed Central journal article supplement — Breed Sci. 2013 Jun 1;63(2):183–96. doi: 10.1270/jsbbs.63.183 (PMC3688380; doi:10.1270/jsbbs.63.183), 2013-06-01
Supplement: 63_183_1.pdf [file 63_183_1.pdf]

**Supplemental Table 1.** Accession no. of nucleotide sequences registered in the DDBJ database

| Name of cultivar/<br>Accession No. | Cluster No. <sup>a</sup> | <i>TrnK-MatK</i><br>CmCp1 | <i>Rps16 intron1</i><br>CmCp2 | <i>PsbK-PsbI</i><br>CmCp3 | <i>AtpH-AtpI</i><br>CmCp5 | <i>PsbC-TrnS</i><br>ccSSR 7 | <i>PsaI-Ycf4</i><br>Cmcp15 | <i>Rpl16-Rpl14</i><br>PS-ID | <i>NdhF-Rpl32</i><br>CmCp6 | <i>NdhA intron1</i><br>CmCp11 |
|------------------------------------|--------------------------|---------------------------|-------------------------------|---------------------------|---------------------------|-----------------------------|----------------------------|-----------------------------|----------------------------|-------------------------------|
| Kinpyo                             | I a-1                    | AB716776                  | AB716781                      | AB716797                  | AB716813                  | AB716829                    | AB716845                   | AB716861                    | AB716877                   | AB716893                      |
| PI 614588                          | I a-2                    | AB716775                  | AB716782                      | AB716798                  | AB716814                  | AB716830                    | AB716846                   | AB716862                    | AB716878                   | AB716894                      |
| PI 482424                          | I a-3                    | AB716774                  | AB716783                      | AB716799                  | AB716815                  | AB716831                    | AB716847                   | AB716863                    | AB716879                   | AB716895                      |
| PI 525105                          | I b-1                    | AB716771                  | AB716784                      | AB716800                  | AB716816                  | AB716832                    | AB716848                   | AB716864                    | AB716880                   | AB716896                      |
| Earl's Favourite                   | I b-2                    | AB716772                  | AB716785                      | AB716801                  | AB716817                  | AB716833                    | AB716849                   | AB716865                    | AB716881                   | AB716897                      |
| Hami-gua 6                         | I b-3                    | AB716773                  | AB716786                      | AB716802                  | AB716818                  | AB716834                    | AB716850                   | AB716866                    | AB716882                   | AB716898                      |
| PI 185111                          | I c-1                    | AB716765                  | AB716787                      | AB716803                  | AB716819                  | AB716835                    | AB716851                   | AB716867                    | AB716883                   | AB716899                      |
| PI 436533                          | I c-2                    | AB716766                  | AB716788                      | AB716804                  | AB716820                  | AB716836                    | AB716852                   | AB716868                    | AB716884                   | AB716900                      |
| PI 490388                          | I c-3                    | AB716767                  | AB716789                      | AB716805                  | AB716821                  | AB716837                    | AB716853                   | AB716869                    | AB716885                   | AB716901                      |
| 940112                             | I c-4                    | AB716768                  | AB716790                      | AB716806                  | AB716822                  | AB716838                    | AB716854                   | AB716870                    | AB716886                   | AB716902                      |
| 940111                             | I c-5                    | AB716769                  | AB716791                      | AB716807                  | AB716823                  | AB716839                    | AB716855                   | AB716871                    | AB716887                   | AB716903                      |
| PI 482413                          | I c-6                    | AB716770                  | AB716792                      | AB716808                  | AB716824                  | AB716840                    | AB716856                   | AB716872                    | AB716888                   | AB716904                      |
| CYS68-1                            | II                       | AB716777                  | AB716793                      | AB716809                  | AB716825                  | AB716841                    | AB716857                   | AB716873                    | AB716889                   | AB716905                      |
| PI 282441                          | III                      | AB716778                  | AB716794                      | AB716810                  | AB716826                  | AB716842                    | AB716858                   | AB716874                    | AB716890                   | AB716906                      |
| PI 292190                          | III                      | AB716779                  | AB716795                      | AB716811                  | AB716827                  | AB716843                    | AB716859                   | AB716875                    | AB716891                   | AB716907                      |
| PI 482383                          | III                      | AB716780                  | AB716796                      | AB716812                  | AB716828                  | AB716844                    | AB716860                   | AB716876                    | AB716892                   | AB716908                      |

<sup>a</sup> Cluster number refers to Fig. 1.

**Supplemental Table 2.** Maximum and minimum values of sequence homology value (%) between 18 accessions of *Cucumis* across nine chloroplast genome regions

| No. | Accession No.         | Species               | Cluster No. | No. <sup>b</sup> |     |     |     |     |     |     |     |     |     |     |     |     |     |     |    |    |    |    |
|-----|-----------------------|-----------------------|-------------|------------------|-----|-----|-----|-----|-----|-----|-----|-----|-----|-----|-----|-----|-----|-----|----|----|----|----|
|     |                       |                       |             | 1                | 2   | 3   | 4   | 5   | 6   | 7   | 8   | 9   | 10  | 11  | 12  | 13  | 14  | 15  | 16 | 17 | 18 |    |
| 1   | PI 482424             | <i>C. melo</i>        | I a-1       | -                | 100 | 100 | 100 | 100 | 100 | 100 | 100 | 100 | 100 | 100 | 100 | 100 | 98  | 98  | 98 | 98 | 99 | 98 |
| 2   | PI 614588             | <i>C. melo</i>        | I a-2       | 100              | -   | 100 | 100 | 100 | 100 | 100 | 100 | 100 | 100 | 100 | 100 | 100 | 98  | 98  | 98 | 98 | 99 | 98 |
| 3   | Kinpyo                | <i>C. melo</i>        | I a-3       | 99               | 99  | -   | 100 | 100 | 100 | 100 | 100 | 100 | 100 | 100 | 100 | 98  | 98  | 98  | 98 | 99 | 98 |    |
| 4   | PI 525105             | <i>C. melo</i>        | I b-1       | 99               | 99  | 99  | -   | 100 | 100 | 100 | 100 | 100 | 100 | 99  | 99  | 99  | 98  | 99  | 98 | 99 | 98 |    |
| 5   | Earl's Favourite      | <i>C. melo</i>        | I b-2       | 99               | 99  | 99  | 100 | -   | 100 | 100 | 100 | 100 | 100 | 99  | 99  | 98  | 98  | 98  | 98 | 99 | 98 |    |
| 6   | Hami-gua 6            | <i>C. melo</i>        | I b-3       | 99               | 99  | 99  | 100 | 100 | -   | 100 | 100 | 100 | 100 | 99  | 99  | 99  | 98  | 99  | 98 | 99 | 98 |    |
| 7   | PI 185111             | <i>C. melo</i>        | I c-1       | 99               | 99  | 99  | 99  | 99  | 99  | -   | 100 | 100 | 100 | 100 | 100 | 99  | 99  | 99  | 98 | 99 | 98 |    |
| 8   | PI 436533             | <i>C. melo</i>        | I c-2       | 99               | 99  | 99  | 99  | 99  | 99  | 99  | -   | 100 | 100 | 100 | 100 | 99  | 99  | 99  | 98 | 99 | 98 |    |
| 9   | PI 490388             | <i>C. melo</i>        | I c-3       | 99               | 99  | 99  | 99  | 99  | 99  | 99  | 99  | -   | 100 | 100 | 100 | 99  | 99  | 99  | 98 | 99 | 98 |    |
| 10  | 940112                | <i>C. melo</i>        | I c-4       | 99               | 99  | 99  | 99  | 99  | 99  | 99  | 99  | 99  | -   | 100 | 100 | 99  | 99  | 99  | 98 | 99 | 98 |    |
| 11  | 940111                | <i>C. melo</i>        | I c-5       | 99               | 99  | 99  | 99  | 99  | 99  | 99  | 99  | 99  | 99  | -   | 100 | 99  | 99  | 99  | 98 | 98 | 98 |    |
| 12  | PI 505602             | <i>C. melo</i>        | I c-6       | 99               | 99  | 99  | 99  | 99  | 99  | 99  | 99  | 99  | 99  | 100 | -   | 99  | 99  | 99  | 98 | 98 | 98 |    |
| 13  | CYS68-2               | <i>C. hystrix</i>     | II          | 96               | 96  | 96  | 96  | 96  | 96  | 96  | 96  | 96  | 96  | 96  | 96  | -   | 100 | 100 | 99 | 99 | 99 |    |
| 14  | Sm021-3               | <i>C. hystrix</i>     | II          | 96               | 96  | 95  | 96  | 96  | 96  | 96  | 96  | 96  | 96  | 95  | 95  | 95  | -   | 100 | 99 | 99 | 98 |    |
| 15  | DQ865976 <sup>a</sup> | <i>C. sativus</i>     | II          | 96               | 96  | 96  | 96  | 96  | 96  | 96  | 96  | 96  | 96  | 96  | 96  | 95  | 95  | -   | 99 | 99 | 99 |    |
| 16  | PI 282441             | <i>C. sagittatus</i>  | III         | 96               | 96  | 96  | 96  | 96  | 96  | 96  | 95  | 95  | 95  | 96  | 96  | 95  | 96  | 95  | -  | 99 | 98 |    |
| 17  | PI 292190             | <i>C. metuliferus</i> | III         | 94               | 93  | 93  | 94  | 94  | 94  | 94  | 94  | 94  | 94  | 94  | 94  | 94  | 94  | 94  | 94 | 95 | -  | 98 |
| 18  | PI 482383             | <i>C. anguria</i>     | III         | 95               | 95  | 95  | 95  | 95  | 95  | 95  | 94  | 94  | 94  | 95  | 95  | 95  | 95  | 95  | 95 | 96 | 96 | -  |

<sup>a</sup>The accession number of cucumber chloroplast genome sequence was indicated.

<sup>b</sup>The maximum and minimum of sequence homology were shown in the right upper side and the left lower side, respectively.
